# Supplementary material
Source: PubMed Central journal article supplement (PMC4250365)
Supplement: me-14-1208-1.pdf [file me-14-1208-1.pdf]

Dang et al. GnRH evokes localized subplasmalemmal calcium signaling in gonadotropes

**SUPPLEMENTAL MOVIE 1.** Representative TIRF movie showing localized  $\text{Ca}^{2+}$  influx in an  $\alpha\text{T3-1}$  cell exposed to GnRH as described in Figure 1.
